# Supplementary material for: Serious and Life-Threatening Pregnancy-Related Infections: Opportunities to Reduce the Global Burden
Source: PLoS Med. 2012 Oct 9;9(10):e1001324. doi: 10.1371/journal.pmed.1001324 (PMC3467240; doi:10.1371/journal.pmed.1001324)
Supplement: Text S1 — Diagnostic and treatment guidelines for serious maternal infections in LMICs. (PDF) [file pmed.1001324.s001.pdf]

**Supplemental Appendix. Diagnostic and Treatment Guideline for Serious Maternal Infections in LMIC\***

| Syndrome                                           | Signs & Symptoms Typically Present                                                                                                                                                                                | Signs & Symptoms Sometimes Present                                                                                                                                                             | Diagnosis- Gold Standard                                                                                                                                                                                        | Diagnosis- Other                                                                                                                                                                                                                                                                                                                                                                     | Treatment                                                                                                                                                                                                                                                                                                                                                                                                                                                  | Follow-up                                                                                                                                                                                                                                                                                                                                                                                                       |
|----------------------------------------------------|-------------------------------------------------------------------------------------------------------------------------------------------------------------------------------------------------------------------|------------------------------------------------------------------------------------------------------------------------------------------------------------------------------------------------|-----------------------------------------------------------------------------------------------------------------------------------------------------------------------------------------------------------------|--------------------------------------------------------------------------------------------------------------------------------------------------------------------------------------------------------------------------------------------------------------------------------------------------------------------------------------------------------------------------------------|------------------------------------------------------------------------------------------------------------------------------------------------------------------------------------------------------------------------------------------------------------------------------------------------------------------------------------------------------------------------------------------------------------------------------------------------------------|-----------------------------------------------------------------------------------------------------------------------------------------------------------------------------------------------------------------------------------------------------------------------------------------------------------------------------------------------------------------------------------------------------------------|
| <b>Acute Pyelonephritis</b>                        | <ul style="list-style-type: none"> <li>• Dysuria</li> <li>• Spiking fever/chills</li> <li>• Increases frequency and urgency of urination</li> <li>• Abdominal pain</li> <li>• Costovertebral anle pain</li> </ul> | <ul style="list-style-type: none"> <li>• Retropubic/suprapubic pain</li> <li>• Loin/pain tenderness</li> <li>• Tenderness in ribcage</li> <li>• Anorexia</li> <li>• Nausea/vomiting</li> </ul> | <ul style="list-style-type: none"> <li>• Mid-stream clean-catch urine culture</li> <li>• Antibiotic sensitivity testing if possible</li> </ul>                                                                  | <ul style="list-style-type: none"> <li>• Urine dipstick (leukocyte esterase or nitrate reductase)</li> <li>• Urine Gram stain</li> </ul>                                                                                                                                                                                                                                             | <ul style="list-style-type: none"> <li>• Initiate treatment for shock, if present</li> <li>• Start IV infusion, infuse IV fluids at 150 mL/hour</li> <li>• Treat with anitbiotic appropriate for organism</li> <li>• If urine culture is unavailable treat with ampicillin* 2 g IV every 6 hours <i>plus</i> gentamicin 5 mg/kg body weight IV every 24 hours</li> </ul>                                                                                   | <ul style="list-style-type: none"> <li>• Re-evaluate antibiotic regime if no improvement after 72 hours</li> <li>• Continue treatment until woman is free of fever for 48 hours, then give amoxicillin 1 g by mouth 3 times/day to complete 14 days of treatment**</li> </ul>                                                                                                                                   |
| <b>Septic Abortion</b>                             | <ul style="list-style-type: none"> <li>• Foul-smelling vaginal discharge in first 22 weeks</li> <li>• Fever</li> <li>• Uterine tenderness</li> <li>• Cervical motion tenderness</li> </ul>                        | <ul style="list-style-type: none"> <li>• Lower abdominal pain</li> <li>• Rebound tenderness</li> <li>• Prolonged bleeding</li> <li>• Purulent cervical discharge</li> </ul>                    | <ul style="list-style-type: none"> <li>• Relies on clinical signs and symptoms and should be considered in any woman of reproductive age presenting with vaginal bleeding, abdominal pain and fever.</li> </ul> | <ul style="list-style-type: none"> <li>• Pelvic exam to visualize vaginal or cervical laceration and visible retained products of conception</li> <li>• Positive pregnancy test indicates a current or recent pregnancy</li> </ul>                                                                                                                                                   | <ul style="list-style-type: none"> <li>• Immediately initiate antibiotic therapy: Ampicillin 2 g IV every 6 hours <i>plus</i> gentamicin 5 mg/kg body weight IV every 24 hours <i>plus</i> metronidazole 500 mg IV every 8 hours</li> <li>• Removal of retained products of conception</li> <li>• Fluid resuscitation and support therapy as needed to manage septic shock</li> </ul>                                                                      | <ul style="list-style-type: none"> <li>• Continue antibiotic therapy until woman is free of fever for 48 hours</li> </ul>                                                                                                                                                                                                                                                                                       |
| <b>Chorioamnionitis (Intra-amniotic infection)</b> | <ul style="list-style-type: none"> <li>• Fever/chills</li> <li>• Foul-smelling watery discharge after 22 weeks</li> <li>• Abdominal pain</li> </ul>                                                               | <ul style="list-style-type: none"> <li>• History of amniotic fluid loss</li> <li>• Tender uterus</li> <li>• Rapid fetal heart rate</li> <li>• Light vaginal bleeding</li> </ul>                | <ul style="list-style-type: none"> <li>• Amniocentesis followed by culture of the amniotic fluid</li> </ul>                                                                                                     | <ul style="list-style-type: none"> <li>• Based on clinical signs of inflammation including the presence of maternal fever (&gt;38C) with the presence of 2 other signs including maternal leukocytosis (&gt;15,000 cells/mm<sup>3</sup>), maternal tachycardia (&gt;100bpm), fetal tachycardia (&gt;160bpm), uterine tenderness and foul smelling/purulent amniotic fluid</li> </ul> | <ul style="list-style-type: none"> <li>• Give antibiotics until delivery: Ampicillin 2 g IV every 6 hours <i>plus</i> gentamicin 5 mg/kg body weight every 24 hours</li> <li>• Deliver baby as soon as possible: <ul style="list-style-type: none"> <li>• If cervix is favourable, induce labor with oxytocin</li> <li>• If cervix is unfavorable, ripen cervix with prostaglandins and infuse oxytocin or perfrm caesarean section</li> </ul> </li> </ul> | <ul style="list-style-type: none"> <li>• If vaginal delivery occurs discontinue antibiotics, but if c-sction occurs contibue antibiotics and give metronidazole 500 mg IV every 8 hours untl fever-free for 48 hours</li> <li>• Monitor for development of puerperal sepsis, and if suspected give antibiotics</li> <li>• If neonatal sepsis is supected, perform blood culture and give antibiotics</li> </ul> |

| Syndrome                                      | Signs & Symptoms Typically Present                                                                                                                                                       | Signs & Symptoms Sometimes Present                                                                                                     | Diagnosis- Gold Standard                                                                                                                                                                                                                                                                                          | Diagnosis- Other                                                                                                                                                                                                      | Treatment                                                                                                                                                                                                                                                                                                                                                                                                                                                                                                                                                                                                    | Follow-up                                                                                                                                                                                                                               |
|-----------------------------------------------|------------------------------------------------------------------------------------------------------------------------------------------------------------------------------------------|----------------------------------------------------------------------------------------------------------------------------------------|-------------------------------------------------------------------------------------------------------------------------------------------------------------------------------------------------------------------------------------------------------------------------------------------------------------------|-----------------------------------------------------------------------------------------------------------------------------------------------------------------------------------------------------------------------|--------------------------------------------------------------------------------------------------------------------------------------------------------------------------------------------------------------------------------------------------------------------------------------------------------------------------------------------------------------------------------------------------------------------------------------------------------------------------------------------------------------------------------------------------------------------------------------------------------------|-----------------------------------------------------------------------------------------------------------------------------------------------------------------------------------------------------------------------------------------|
| <b>Puerperal Sepsis/Endometritis</b>          | <ul style="list-style-type: none"> <li>• Fever/chills</li> <li>• Lower abdominal pain</li> <li>• Purulent, foul smelling lochia</li> <li>• Tender uterus</li> </ul>                      | <ul style="list-style-type: none"> <li>• Light vaginal bleeding</li> <li>• Shock</li> </ul>                                            | <ul style="list-style-type: none"> <li>• Relies on recognition of clinical signs and symptoms including maternal fever (&gt;38C), pain, uterine tenderness, cervical motion tenderness, tachycardia, leukocytosis and unusual or foul smelling discharge</li> </ul>                                               | <ul style="list-style-type: none"> <li>• Culture of endometrial cavity may confirm diagnosis of sepsis, but is problematic because cultures obtained transvaginally or transcervically may be contaminated</li> </ul> | <ul style="list-style-type: none"> <li>• Immediately initiate antibiotic therapy: <ul style="list-style-type: none"> <li>• Ampicillin 2 g IV every 6 hours <i>plus</i> gentamicin 5 mg/kg body weight IV every 24 hours <i>plus</i> metronidazole 500 mg IV every 8 hours</li> <li>• Provide support therapy as needed</li> <li>• If present, remove retained placental fragments</li> <li>• If uterus is necrotic and septic perform hysterectomy</li> </ul> </li> </ul>                                                                                                                                    | <ul style="list-style-type: none"> <li>• Continue antibiotic therapy until woman is free of fever for 48 hours. If no improvement, and signs of general peritonitis are present, perform laparotomy to drain pus</li> </ul>             |
| <b>Cellulitis &amp; Necrotizing Fasciitis</b> | <ul style="list-style-type: none"> <li>• Painful and tender wound</li> <li>• Erythema and oedema beyond edge of incision</li> <li>• Intense pain</li> <li>• Unexplained fever</li> </ul> | <ul style="list-style-type: none"> <li>• Hardened wound</li> <li>• Purulent discharge</li> <li>• Reddened area around wound</li> </ul> | <ul style="list-style-type: none"> <li>• Relies on recognition of clinical signs and symptoms, especially pain, redness and other signs of inflammation</li> <li>• Direct observation of wound site to look for redness, heat or tenderness as well as tissue separation</li> <li>• Wound site culture</li> </ul> | <ul style="list-style-type: none"> <li>• Imaging studies</li> </ul>                                                                                                                                                   | <ul style="list-style-type: none"> <li>• <i>If infection does not involve deep tissue:</i> Ampicillin 500 mg by mouth 4 times/day for 5 days <i>plus</i> metronidazole 400 mg by mouth 3 times/day for 5 days; if fluid or pus is present, open and drain wound; remove infected skin or subcutaneous sutures and debride wound</li> <li>• <i>If infection involves deep tissues:</i> Penicillin G 2 million units IV every six hours <i>plus</i> gentamicin 5 mg/kg body weight IV every 24 hours <i>plus</i> metronidazole 500 mg IV every eight hours; wide surgical debridement is mandatory#</li> </ul> | <ul style="list-style-type: none"> <li>• For necrotizing fasciitis, once woman is fever free for 48 hours, give ampicillin 500 mg IV 4 times/day for 5 days <i>plus</i> metronidazole 400 mg by mouth 3 times/day for 5 days</li> </ul> |

\*All guidelines taken from IMPAC publication: Managing Complications in Pregnancy and Childbirth: A guide for midwives and doctors

\*\* Treatment with penicillins not recommended in high income countries with high prevalence of E. coli resistance. Use 2nd or 3rd generation cephalosporin

# Appropriate surgical debridement is mandatory (average patient requires 3 debridements). Survival with antibiotic therapy alone is rare.
